# Supplementary material for: Validation and Assessment of Three Methods to Estimate 24-h Urinary Sodium Excretion from Spot Urine Samples in High-Risk Elder Patients of Stroke from the Rural Areas of Shaanxi Province
Source: MDPI journal article supplement (doi:10.3390/ijerph14101211), 2017-10-11
Supplement: s1 [file s1]

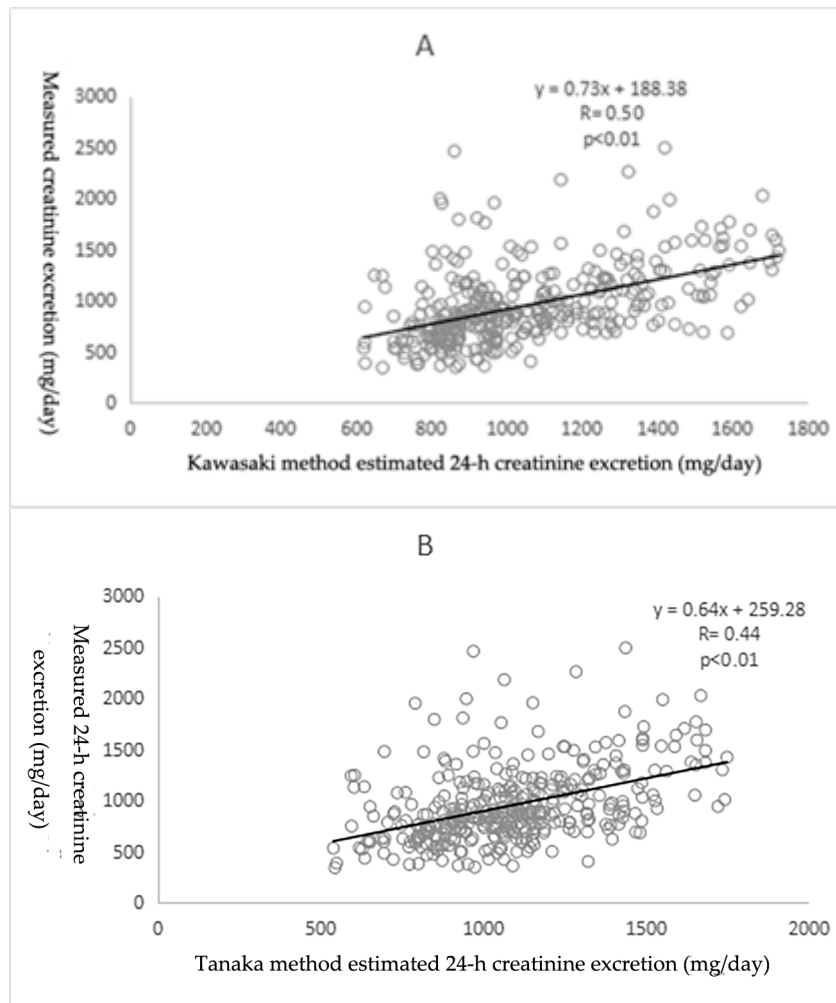

**Figure S1.** Scatter plots of measured 24-hour creatinine excretion (mg/day) vs Kawasaki. (A) and Tanaka; (B) methods estimated 24-hour creatinine excretion (mg/day). The hollow circles were scatter points of measured and estimated values. The solid black line was the regression line of the scatters.

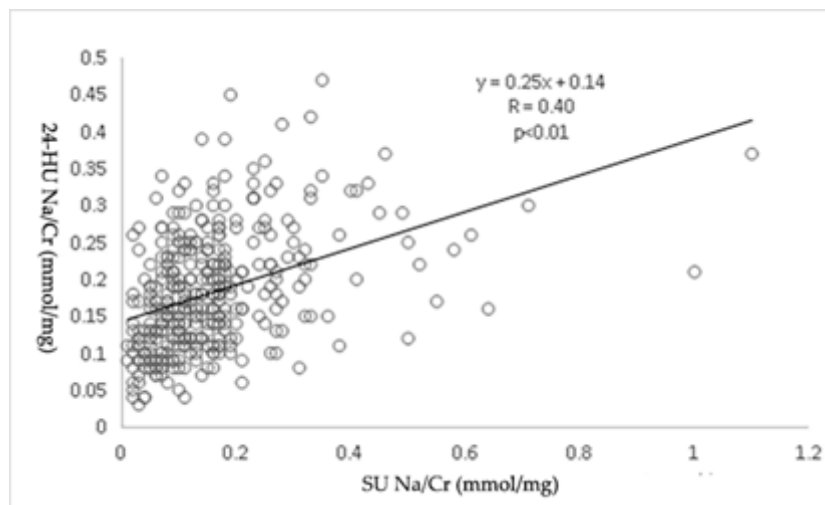

**Figure S2.** Scatter plots of the ratio of sodium to creatinine (mmol/mg) in spot urine vs the ratio of sodium to creatinine in 24-hour urine (mmol/mg). The hollow circles were scatter points of the ratio values. The solid black line was the regression line of the scatters.
